# Supplementary material
Source: PubMed Central journal article supplement (PMC3634576)

Type of file: figure

Label: fig 1

Filename: Canto Supplement Fig 1.pdf

**A**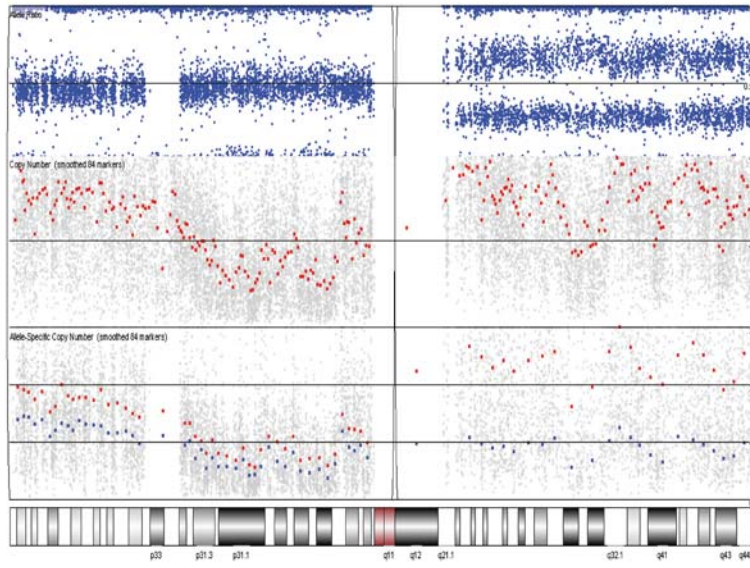**B**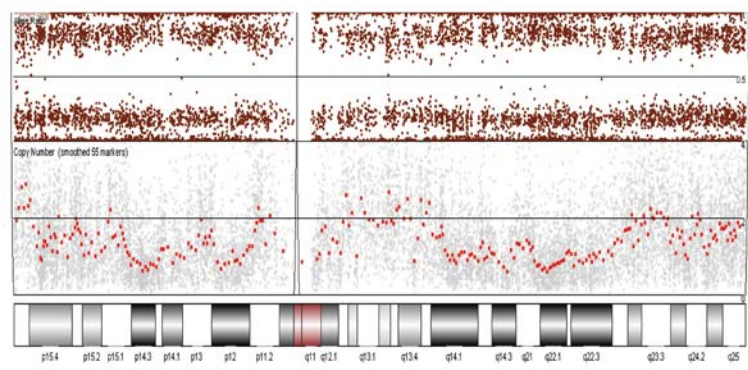

Type of file: figure

Label: fig 2

Filename: Canto Supplement Fig 2.pdf

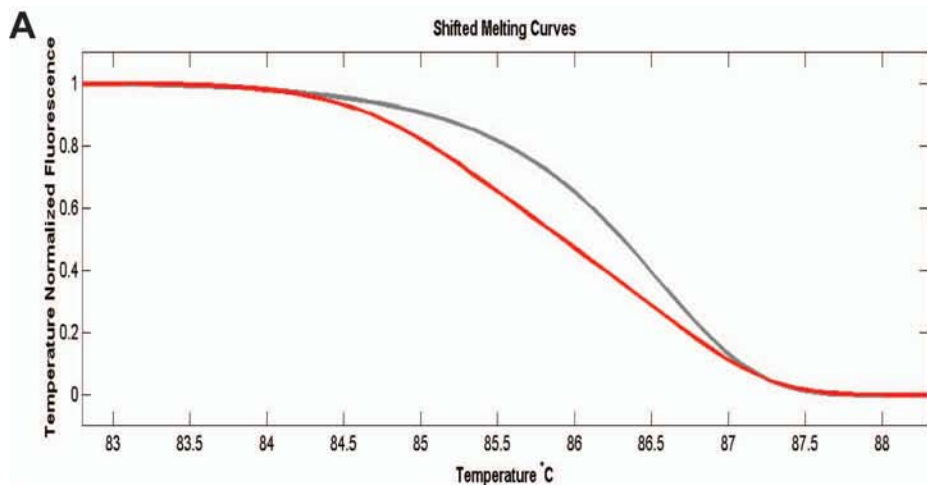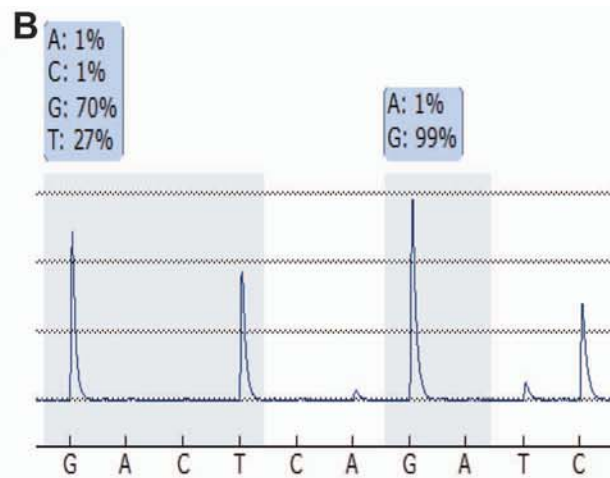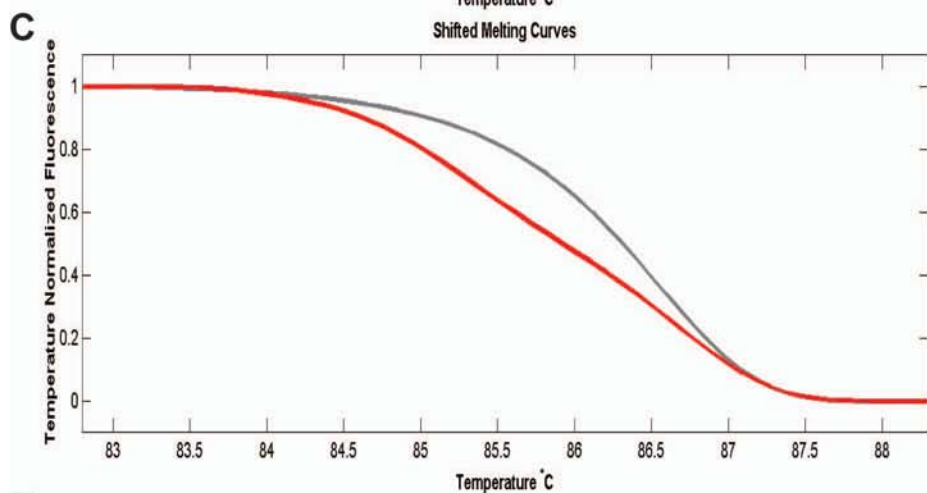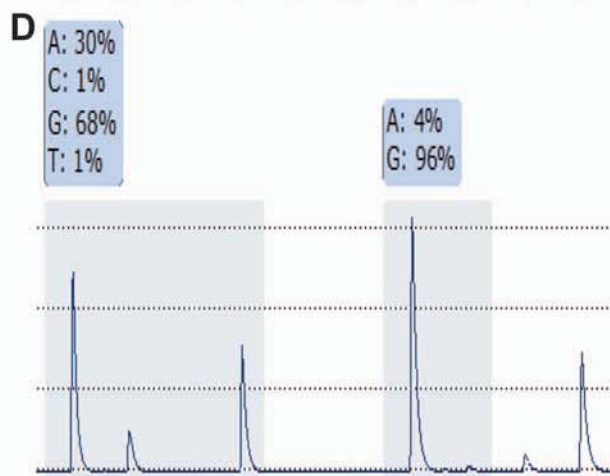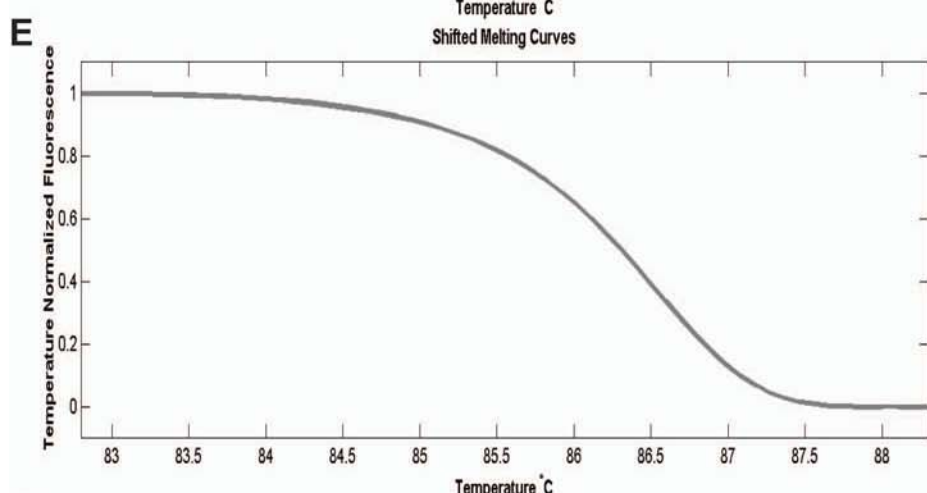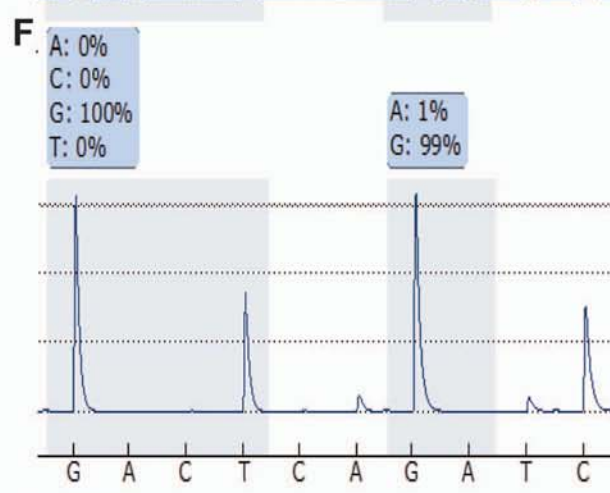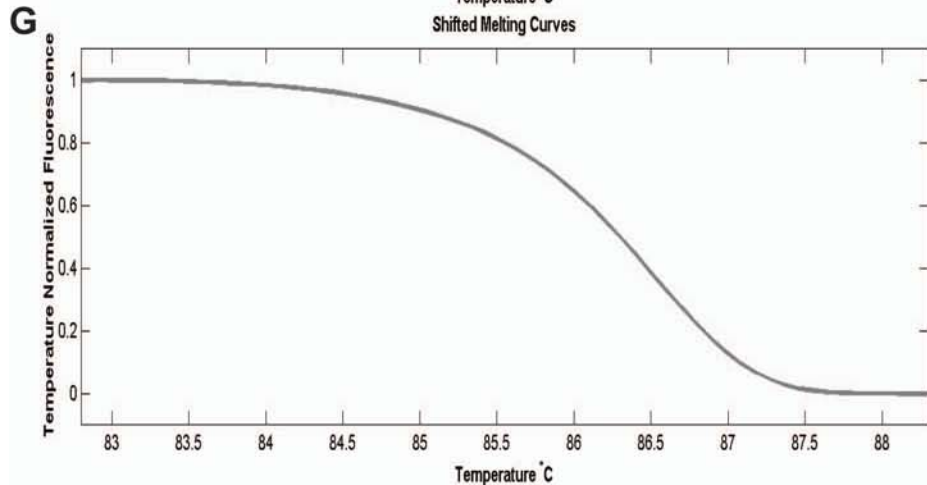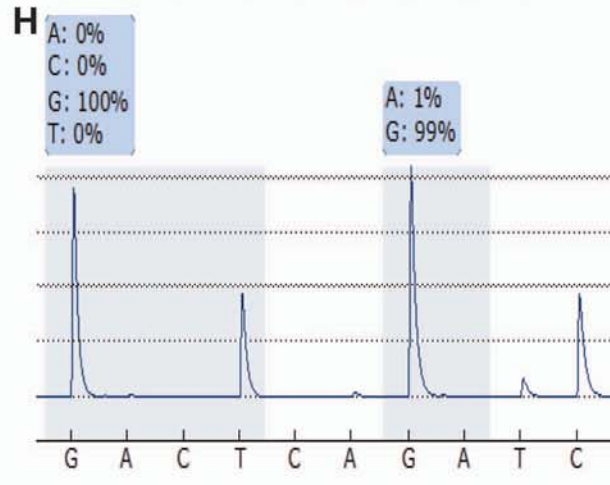

Supplement: NIHMS403265-supplement-01.pdf [file NIHMS403265-supplement-01.pdf]
