# Supplementary material
Source: PubMed Central journal article supplement (PMC3634576)
Supplement: NIHMS403265-supplement-supplementary_data.pdf [file NIHMS403265-supplement-supplementary_data.pdf]

**Supplemental Figure 1.** Copy number alterations in case 1 (PanIN-1). For A-D: The upper, middle and lower panels are the allele ratio, the copy number and the allele-specific ratio, respectively. Each red and blue dot in the lower panel represents allele and the dots are displayed on the panel to indicate the ratio of each allele. **A)** Lesion 6, PanIN-1, chromosome 1. **B)** Endocrine neoplasm, chromosome 11.

**Supplemental Figure 2.** High resolution melt-curve analysis (left panels) and pyrosequencing (right panels) data. **A-B)** mutant *KRAS* (G12V) from case 308 (PanIN-1 lesion). **C-D)** mutant *KRAS* (G12D) case 804 (PanIN-1 lesion). **E-F)** Wild type *KRAS* from cases 506 (IPMN with low-grade dysplasia). **G-H)** Wild-type *KRAS* control, SKMB cell line.
